# Supplementary material for: Mitii™ ABI: study protocol of a randomised controlled trial of a web-based multi-modal training program for children and adolescents with an Acquired Brain Injury (ABI)
Source: BMC Neurol. 2015 Aug 19;15:140. doi: 10.1186/s12883-015-0381-6 (PMC4544804; doi:10.1186/s12883-015-0381-6)

# Mitii Reward Chart

Make your way through the Mitii Reward Chart to get prizes along the way and special rewards at the end of each 5 week stage!

Practice **30** minutes of Mitti each day for one sticker. You will get a prize when you have 6 stickers in a week!

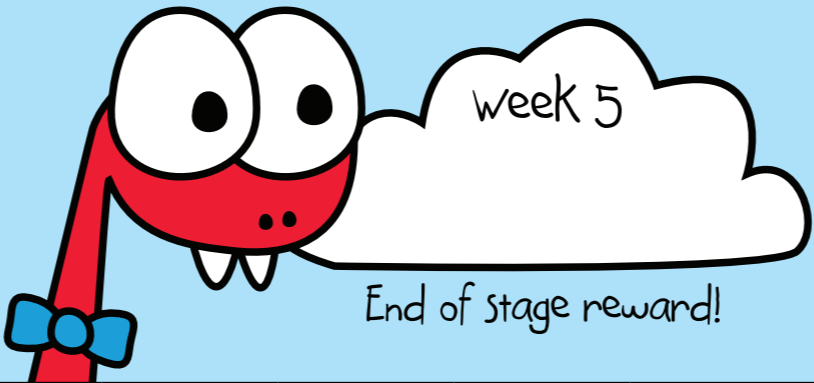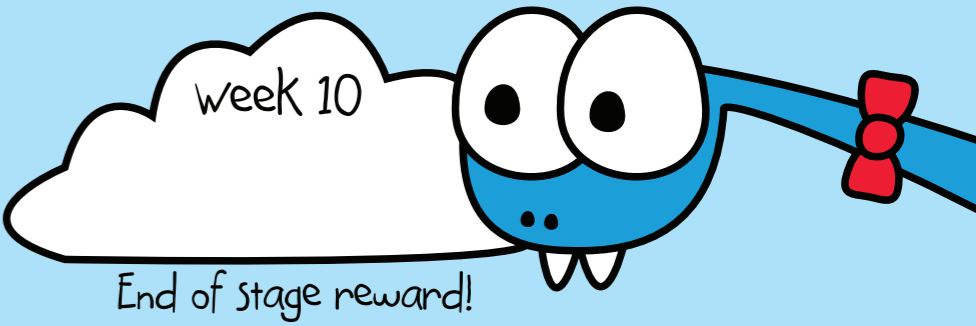

| 6<br>Prize<br>Time! | Week 1<br>Prize | Week 2<br>Prize | Week 3<br>Prize | Week 4<br>Prize | Week 5<br>Prize | You have<br>now<br>finished<br>Mitii<br>Stage 1 | Week 6<br>Prize | Week 7<br>Prize | Week 8<br>Prize | Week 9<br>Prize | Week 10<br>Prize | WELL<br>DONE!<br><br>You have<br>now<br>finished<br>Mitii<br>Stage 2 |
|---------------------|-----------------|-----------------|-----------------|-----------------|-----------------|-------------------------------------------------|-----------------|-----------------|-----------------|-----------------|------------------|----------------------------------------------------------------------|
| 5                   |                 |                 |                 |                 |                 |                                                 |                 |                 |                 |                 |                  |                                                                      |
| 4                   |                 |                 |                 |                 |                 |                                                 |                 |                 |                 |                 |                  |                                                                      |
| 3                   |                 |                 |                 |                 |                 |                                                 |                 |                 |                 |                 |                  |                                                                      |
| 2                   |                 |                 |                 |                 |                 |                                                 |                 |                 |                 |                 |                  |                                                                      |
| 1                   |                 |                 |                 |                 |                 |                                                 |                 |                 |                 |                 |                  |                                                                      |
| Week                | 1               | 2               | 3               | 4               | 5               | well Done!                                      | 6               | 7               | 8               | 9               | 10               |                                                                      |

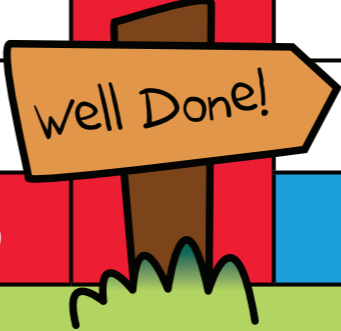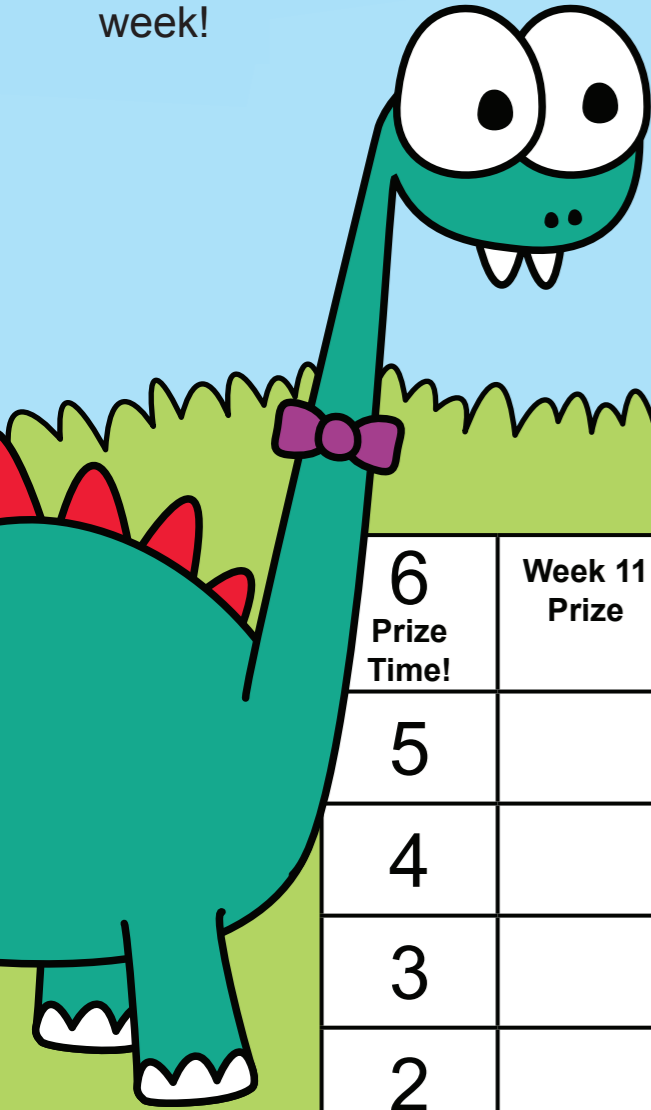

| 6<br>Prize<br>Time! | Week 11<br>Prize | Week 12<br>Prize | Week 13<br>Prize | Week 14<br>Prize | Week 15<br>Prize | WELL<br>DONE!<br><br>You have<br>now<br>finished<br>Mitii<br>Stage 3 | Week 16<br>Prize | Week 17<br>Prize | Week 18<br>Prize | Week 19<br>Prize | Week 20<br>Prize | WELL<br>DONE!<br><br>You have<br>now<br>finished<br>Mitii |
|---------------------|------------------|------------------|------------------|------------------|------------------|----------------------------------------------------------------------|------------------|------------------|------------------|------------------|------------------|-----------------------------------------------------------|
| 5                   |                  |                  |                  |                  |                  |                                                                      |                  |                  |                  |                  |                  |                                                           |
| 4                   |                  |                  |                  |                  |                  |                                                                      |                  |                  |                  |                  |                  |                                                           |
| 3                   |                  |                  |                  |                  |                  |                                                                      |                  |                  |                  |                  |                  |                                                           |
| 2                   |                  |                  |                  |                  |                  |                                                                      |                  |                  |                  |                  |                  |                                                           |
| 1                   |                  |                  |                  |                  |                  |                                                                      |                  |                  |                  |                  |                  |                                                           |
| Week                | 11               | 12               | 13               | 14               | 15               | week 15<br><br>End of stage<br>reward!                               | 16               | 17               | 18               | 19               | 20               |                                                           |

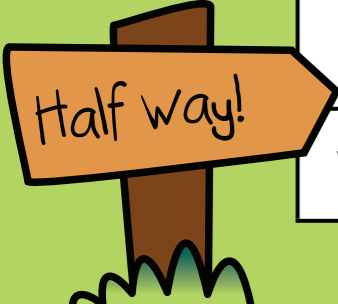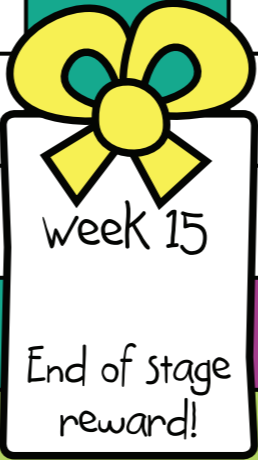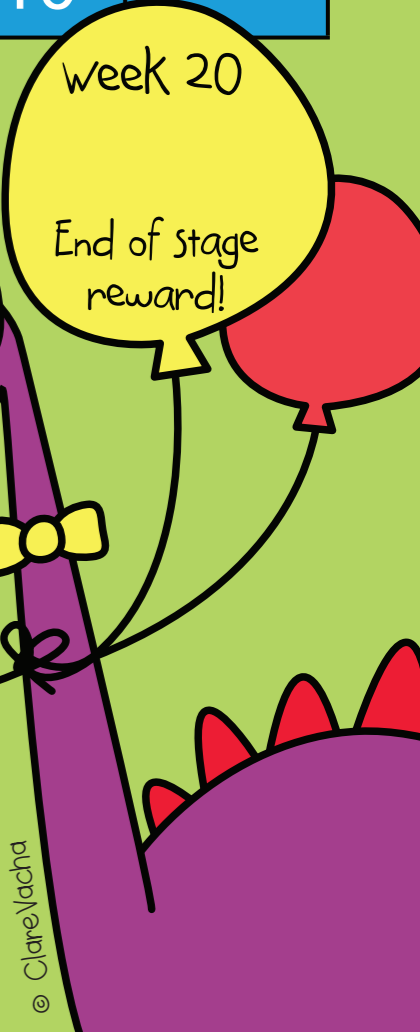

Supplement: Additional file 2: — Mitii TM ABI rewards chart (child version).ᅟ [file 12883_2015_381_MOESM2_ESM.pdf]
